# Supplementary material for: Multimodel simulation of vertical gas transfer in a temperate lake
Source: Copernicus journal article supplement (doi:10.5194/hess-24-697-2020), 2020-02-17
Supplement: Supplementary file 2 [file hess-24-697-2020-supplement.zip]

Supplement of Hydrol. Earth Syst. Sci., 24, 697–715, 2020  
<https://doi.org/10.5194/hess-24-697-2020-supplement>  
© Author(s) 2020. This work is distributed under  
the Creative Commons Attribution 4.0 License.

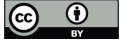

*Supplement of*

## **Multimodel simulation of vertical gas transfer in a temperate lake**

**Sofya Guseva et al.**

*Correspondence to:* Sofya Guseva (guseva@uni-landau.de)

- [hess-24-697-2020-supplement-title-page.pdf](#)
- [SI\\_Simulation\\_Protocol.pdf](#)
- [SI\\_final\\_version.pdf](#)

The copyright of individual parts of the supplement might differ from the CC BY 4.0 License.
