# Supplementary material for: Multimodel simulation of vertical gas transfer in a temperate lake
Source: Copernicus journal article supplement (doi:10.5194/hess-24-697-2020), 2020-02-17
Supplement: Supplementary file 3 [file hess-24-697-2020-supplement.zip]

Supporting information to the paper by  
Guseva, S., Bleninger, T., Jöhnk, K., Polli, B.A., Tan, Z., Thiery, W., Zhuang, Q.,  
Rusak, J., Yao, H., Lorke, A. and Stepanenko, V. "Multimodel simulation of verti-  
cal gas transfer in a temperate lake"

5 1 Figures

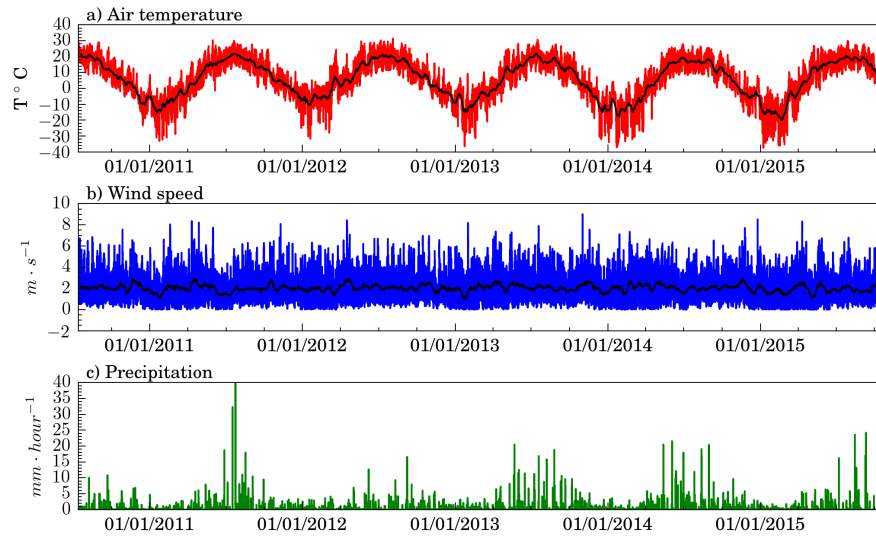

**Figure S1.** Time-series of meteorological variables: air temperature, wind speed and precipitation. Black line indicates the moving average with a window of half a month.

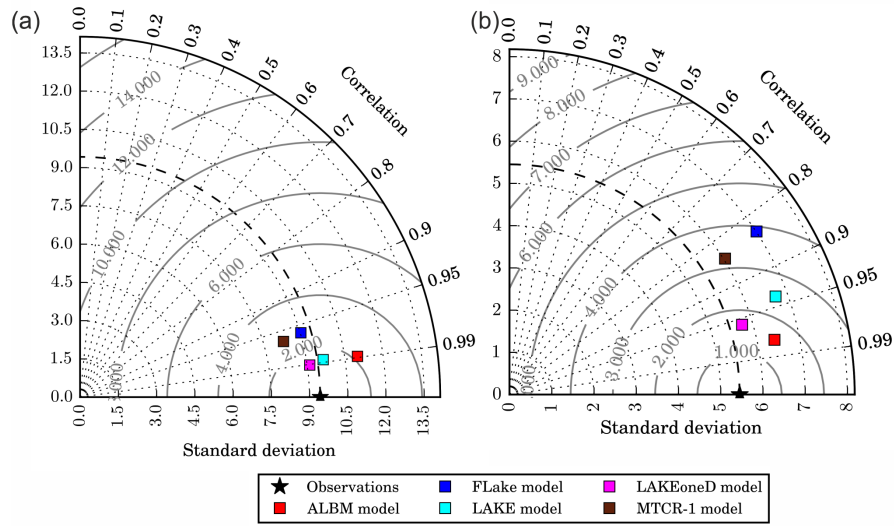

**Figure S2.** Taylor diagram for the water temperature at (a) surface (b) all depths in RefSim. Grey lines indicate  $RMSE_c$  ( $^{\circ}C$ ), the radial distance from the origin is the standard deviation ( $^{\circ}C$ ), an azimuthal position denote the correlation coefficient (Taylor et al., 2001).

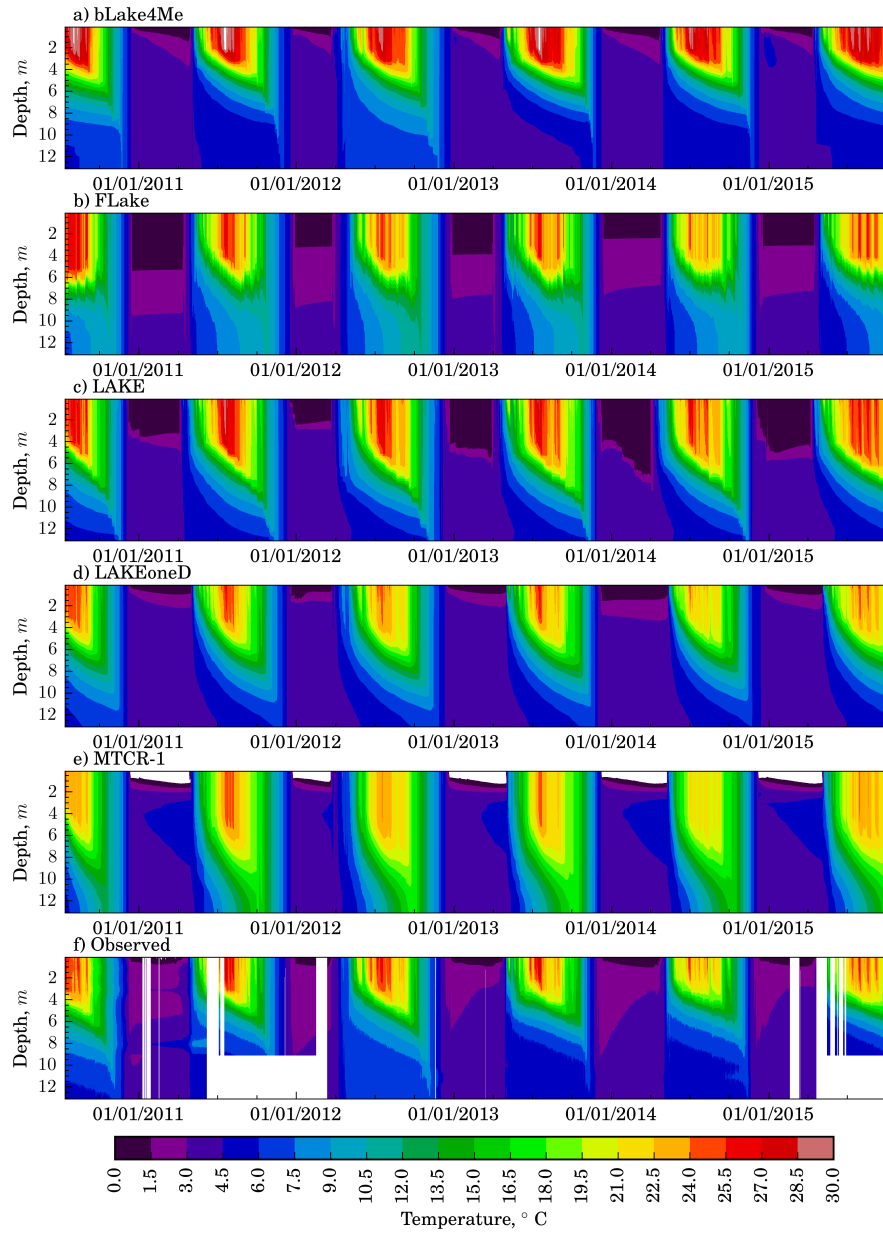

**Figure S3.** Time-depth pattern of temperature in Harp Lake (14.07.2010-19.10.2015), LDSim and observed data.

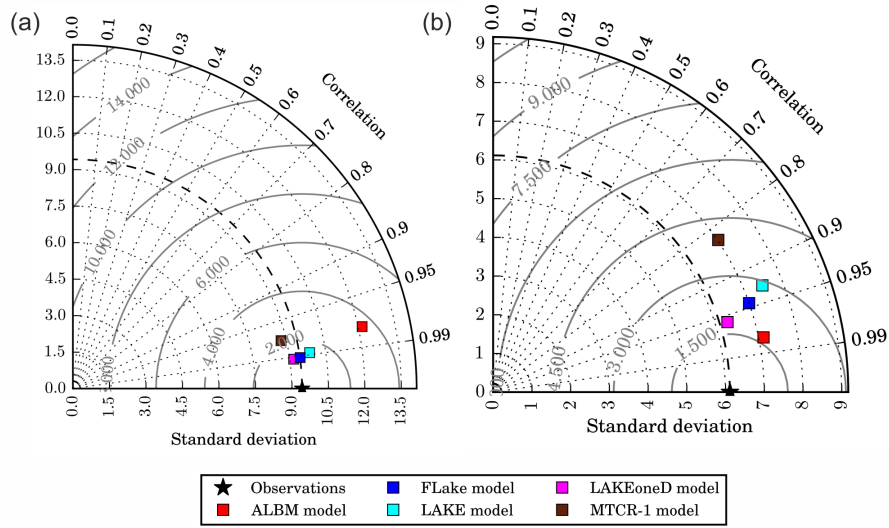

**Figure S4.** Taylor diagram for the water temperature at (a) surface (b) all depths in LDSim. Grey lines indicate  $RMSE_c$  ( $^{\circ}C$ ), the radial distance from the origin is the standard deviation ( $^{\circ}C$ ), an azimuthal position denote the correlation coefficient.

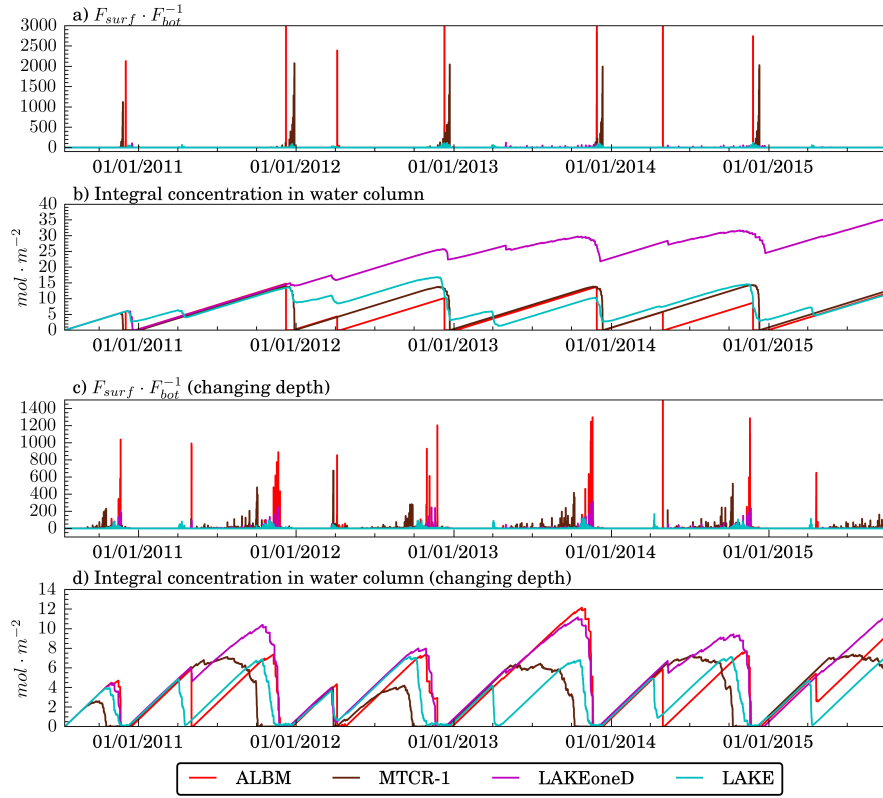

**Figure S5.** Time-series of the surface flux, normalized by bottom flux, and the total tracer amount in the water column: (a, b) RefSim, 37.5 m, (c, d) LDSim, 13.32 m.

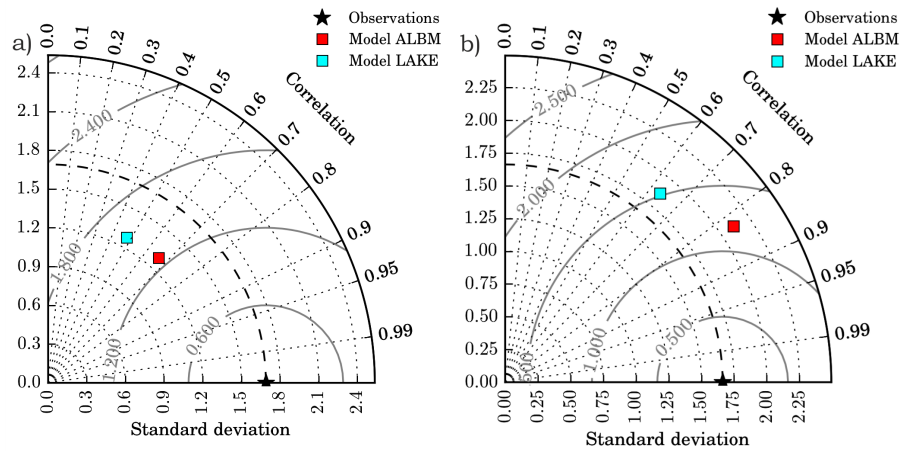

**Figure S6.** Taylor diagram for the modeled  $\text{O}_2$  concentration at depths of (a) 1 m (b) 18 m in GasSim.

## 2 Tables

**Table S1.** Biogeochemical processes represented in ALBM, LAKE models.

|                                         | ALBM                                               | LAKE                                                                   |
|-----------------------------------------|----------------------------------------------------|------------------------------------------------------------------------|
| Gas exchange at the air-water interface | Surface renewal model (Heiskanen et al., 2014)     | Surface renewal model (MacIntyre et al., 2010; Heiskanen et al., 2014) |
| Sedimentary oxygen demand               | (Hanson et al., 2004; Stefan and Fang, 1994)       | (Walker and Snodgrass, 1986)                                           |
| Photosynthesis                          | (Tian, 2006; Hipsey et al., 2008; Li et al., 2010) | (Megard et al., 1984; Stefan and Fang, 1994)                           |
| Respiration                             | (Hanson et al., 2004)                              | (Stefan and Fang, 1994)                                                |
| Biochemical oxygen demand               | (Hipsey et al., 2008; Hanson et al., 2011)         | (Stefan and Fang, 1994)                                                |
| DIC from inflow                         | (Hanson et al., 2004)                              | -                                                                      |
| DOC and POC                             | (Hanson et al., 2004)                              | -                                                                      |

**Table S2.** Mean depth of mixed layer in models in RefSim and LDSim.

| Mean depth of mixed layer, m <sup>1</sup> | ALBM | FLake | LAKE | LAKEoneD | MTCR-1 | Observed |
|-------------------------------------------|------|-------|------|----------|--------|----------|
| RefSim                                    | 2.4  | 5.6   | 4.8  | 3.9      | 5.9    | 3.6      |
| LDSim                                     | 2.1  | 4.5   | 4.9  | 3.7      | 5.8    | 3.6      |

a. <sup>1</sup> is calculated as a mean depth of a maximum for the buoyancy frequency:  $N^2 = \frac{g}{\rho_0} \frac{\partial \rho(T)}{\partial z}$ .

b. The period of averaging is starting from spring ice-off and ending at August, 31

**Table S3.** Dates of ice formation and ice melt in RefSim.

|                  | Ice-  | ALBM         | LAKE              | LAKEoneD            | MTCR-1       | FLake        | Observations |
|------------------|-------|--------------|-------------------|---------------------|--------------|--------------|--------------|
| <b>2010-2011</b> | cover | 24.12.2010** | 15.12.2010        | 06.12.2010          | 05.01.2011** | 22.01.2011** | 10.12.2010   |
|                  | off   | 01.05.2011   | 03.04.2011        | 02.05.2011          | 04.05.2011*  | 09.04.2011** | 27.04.2011   |
| <b>2011-2012</b> | cover | 24.12.2011   | <b>28.12.2011</b> | <b>10.12.2011*</b>  | 29.12.2011   | 15.01.2012** | 28.12.2011   |
|                  | off   | 02.04.2012   | 12.03.2012**      | 23.03.2012          | 25.03.2012   | 21.03.2012*  | 30.03.2012   |
| <b>2012-2013</b> | cover | 05.01.2013** | 27.12.2012**      | <b>28.11.2012**</b> | 24.12.2012*  | 23.01.2013** | 12.12.2012   |
|                  | off   | 22.04.2013   | 29.03.2013**      | 01.05.2013          | 04.05.2013*  | 26.03.2013** | 25.04.2013   |
| <b>2013-2014</b> | cover | 13.12.2013*  | 12.12.2013*       | 10.12.2013*         | 13.12.2013*  | 01.01.2014** | 01.12.2013   |
|                  | off   | 29.04.2014   | 14.04.2014**      | 11.05.2014*         | 13.05.2014*  | 21.04.2014*  | 30.04.2014   |
| <b>2014-2015</b> | cover | 29.12.2014** | 22.12.2014**      | 17.11.2014**        | 12.12.2014*  | 05.01.2015** | 02.12.2014   |
|                  | off   | 17.04.2015   | 02.04.2015**      | 04.05.2015**        | 07.05.2015** | 15.04.2015   | 21.04.2015   |

a. Difference between the model and observations:\* > 1 week ; \*\* > 2 weeks

b. **10.12.2011** dates denoted by bold indicate multiple freezing-melting events after the date

**Table S4.** Statistics of the surface temperature of the lake in RefSim, LDSim, ExtMinSim, ExtMaxSim.

| Experiment |                                  | ALBM   | FLake  | LAKE   | LAKEoneD | MTCR-1 |
|------------|----------------------------------|--------|--------|--------|----------|--------|
| RefSim     | $h_{max} = 37.5$ m               | 2.13 ; | 0.36 ; | 1.11 ; | 0.15 ;   | 0.68 ; |
|            | DM (°C) ; RMSE <sub>c</sub> (°C) | 2.17   | 2.5    | 1.52   | 1.32     | 2.62   |
| LDSim      | $h_{ave} = 13.32$ m              | 1.1 ;  | 0.28 ; | 1.03 ; | 0.21 ;   | 0.16 ; |
|            | DM (°C) ; RMSE <sub>c</sub> (°C) | 3.5    | 1.28   | 1.51   | 1.25     | 2.15   |
| ExtMinSim  | $\mu = 0.28$ m <sup>-1</sup>     | 2.08 ; | 0.37 ; | 1.15 ; | 0.08 ;   | 0.7 ;  |
|            | DM (°C) ; RMSE <sub>c</sub> (°C) | 2.12   | 2.7    | 1.68   | 1.74     | 3.07   |
| ExtMaxSim  | $\mu = 0.68$ m <sup>-1</sup>     | 2.1 ;  | 0.38 ; | 1.13 ; | 0.2 ;    | 0.7 ;  |
|            | DM (°C) ; RMSE <sub>c</sub> (°C) | 2.25   | 2.48   | 1.51   | 1.02     | 2.03   |

### 3 Appendix

#### Brief description of field data at Harp Lake, Ontario, Canada

Oct. 8, 2015 (by Huaxia Yao)

##### 1. Site and lake facts

**Table S5.** Chemical status of lake water.

|                 | mg L <sup>-1</sup> |     | mg L <sup>-1</sup> |                 | mg L <sup>-1</sup> |
|-----------------|--------------------|-----|--------------------|-----------------|--------------------|
| Salinity        | 15                 | DOC | 1.8                | DIC             | 1.5                |
| Cl              | 2.8                | TP  | 4.4                | NO <sub>3</sub> | 0.1                |
| SO <sub>4</sub> | 6.6                | Ca  | 2.6                |                 |                    |
| silica          | 1.8                | Na  | 2.2                |                 |                    |

##### 5 2. High frequency data from a raft buoy (10 minute intervals)

**Table S6.** Meteorological measurements.

|                                                                                                      | Height, m | Period of measurements     | Instrument                                                             |
|------------------------------------------------------------------------------------------------------|-----------|----------------------------|------------------------------------------------------------------------|
| Air temperature                                                                                      | 1.75      | July<br>14, 2010 – present | Vaisala<br>HMP45C air temperature<br>and relative humidity sensor      |
| Relative humidity                                                                                    | 1.75      | July<br>14, 2010 – present | Vaisala<br>HMP45C air temperature<br>and relative humidity sensor      |
| Wind speed                                                                                           | 2         | July<br>14, 2010 – present | RM<br>Young wind monitor<br>model 05103                                |
| Wind direction                                                                                       | 2         | July<br>14, 2010 – present | RM<br>Young wind monitor<br>model 05103                                |
| Atmospheric<br>longwave radiation<br>(earlier data can be got<br>from another land-based<br>station) |           | Nov.<br>5, 2012 – present  | Kipp & Zonen<br>CGR3 Pyrgeometer                                       |
| Short-wave<br>radiation<br>(earlier data can be got<br>from another land-based<br>station)           |           | Nov.<br>5, 2012 – present  | Kipp & Zonen<br>CGR3 Pyrgeometer                                       |
| Precipitation                                                                                        |           |                            | not measured on the raft,<br>but available from<br>neighboring station |
| Atmospheric<br>pressure                                                                              |           |                            | not measured on the raft,<br>but available from<br>neighboring station |



**Table S7.** Measurements in lake water.

|                            | Depth, m                                                            | Period of measurements  | Instrument                                                                        |
|----------------------------|---------------------------------------------------------------------|-------------------------|-----------------------------------------------------------------------------------|
| Chlorophyll-a              | 1                                                                   | Sept. 7, 2011 –present  | YSI 6025<br>Chlorophyll sensor                                                    |
| CO2<br>concentration       | 0.39                                                                | Mar. 12, 2012 –present  | Vaisala GMP343 CO2 Probe<br>with sintered PTFE filter                             |
| Electrical<br>conductivity | 1, 18                                                               | Sept. 11, 2011 –present | YSI 6560 temperature<br>and conductivity sensor                                   |
| DO<br>concentration        | 1, 18                                                               | June 30, 2011 – present | YSI 6150<br>optical oxygen sensor                                                 |
| Water<br>temperature       | 0.1 to 10.1<br>(every 0.25 m<br>intervals between<br>0.1 to 10.1 m) | July 14, 2010 –present  | PME thermistor T-chain<br>with pressure transducer                                |
| Water<br>temperature       | 0.1 to 27.1<br>(1m interval)                                        | Mar. 12, 2012 - present | Campbell Scientific custom<br>thermistor string of model<br>109 temperature probe |

**3. Low frequency lake data (regular monitoring)** (weekly or bi-weekly for ice-free seasons)

Lake profile data: temperature and DO, at 1m interval from 0.1 m to 35m. Started late 1970s. For our selected years 2010-2015, these weekly profile measurements do not cover the winter or ice seasons. Secchi disk depth (bi-weekly or monthly): since 1978

Ice date: 1978 to 2015 Ice thickness (monthly): 1978-1993; and 2013-2015

- 5 Regular meteorology data (daily or hourly): land-based stations, 1978-2015.

**4. Hydrology data**

Stream flow discharge (daily): at 5 inlet streams (HP3, HP3a, HP4, HP5, HP6a), and the outlet (HP0), long-term data Stream water chemistry (weekly or bi-weekly): at all streams

**5. Gap filling, QA/QC**

- 10 The data are basically from raw data of the raft/buoy sensors, with a simple quality check and gap filling.

For our LMIP project, the data have been edited and gap-filled. Missing data (gaps) in atmospheric forcing are infilled mainly by using another dataset of a neighbouring climate station (backyard of DESC office site). Except for air temperature, any missed hourly data at the raft is provided by the values at the neighbouring station. The missings in air temperature are filled by regressions between the two stations which are established for each month (using available hourly data). Any doubt and concern with data are kindly reported to participants and

- 15 Huaxia Yao for a solution.

## References

- Hanson, P. C., Pollard, A. I., Bade, D. L., Predick, K., Carpenter, S. R., and Foley, J. A.: A model of carbon evasion and sedimentation in temperate lakes, *Glob. Change Biol.*, 10(8), 1285-1298, 2004.
- Hanson, P. C., Hamilton, D. P., Stanley, E. H., Preston, N., Langman, O. C., and Kara, E. L.: Fate of allochthonous dissolved organic carbon in lakes: a quantitative approach, *Plos One*, 6(7), e21884, 2011.
- Heiskanen, J. J., Mammarella, I., Haapanala, S., Pumpanen, J., Vesala, T., MacIntyre, S., and Ojala, A.: Effects of cooling and internal wave motions on gas transfer coefficients in a boreal lake, *Tellus B*, 66, 22827, doi:10.3402/tellusb.v66.22827, 2014.
- Hipsey, M. R., and Hamilton, D. P.: Computational aquatic ecosystem dynamic model: CAEDYM ver. 3. Science Manual, Cent. for Water Res. Rep., Univ. of West. Aust., Nedlands, Australia., 2008.
- Li, Q. P., Franks, P. J., Landry, M. R., Goericke, R., and Taylor, A. G.: Modeling phytoplankton growth rates and chlorophyll to carbon ratios in California coastal and pelagic ecosystems, *J. Geophys. Res.-Biogeo.*, 115(G4), 2010.
- MacIntyre, S., Jonsson, A., Jansson, M., Aberg, J., Turney, D. E., and Miller, S. D.: Buoyancy flux, turbulence, and the gas transfer coefficient in a stratified lake, *Geophys. Res. Lett.*, 37, L24604, doi:10.1029/2010GL044164, 2010.
- Megard, R. O., Tonkyn, D. W., and Senft, W. H.: Kinetics of oxygenic photosynthesis in planktonic algae, *J. Plankton Res.*, 6(2), 325-337, 1984.
- Taylor, K. E.: Summarizing multiple aspects of model performance in a single diagram, *J. Geophys. Res.-Atmos.*, 106 (D7), 7183-7192, 2001.
- Tian, R. C.: Toward standard parameterizations in marine biological modeling, *Ecol. Model.*, 193(3-4), 363-386, 2006.
- Stefan, H. G., and Fang, X.: Dissolved oxygen model for regional lake analysis, *Ecol. Model.*, 71(1-3), 37-68, 1994.
- Walker, R. R. and Snodgrass, W. J.: Model for Sediment Oxygen Demand in Lakes, *J. Environ. Eng.*, 112, 25-43, doi:10.1061/(ASCE)0733-9372(1986)112:1(25), 1986.
